# Supplementary material for: Bcl11a is essential for lymphoid development and negatively regulates p53
Source: PubMed Central journal article supplement — J Exp Med. 2012 Dec 17;209(13):2467–83. doi: 10.1084/jem.20121846 (PMC3526365; doi:10.1084/jem.20121846), 2012-12-17
Supplement: supp_jem.20121846_JEM_20121846_sm.pdf [file supp_jem.20121846_JEM_20121846_sm.pdf]

## SUPPLEMENTAL MATERIAL

Yu et al., <http://www.jem.org/cgi/content/full/jem.20121846/DC1>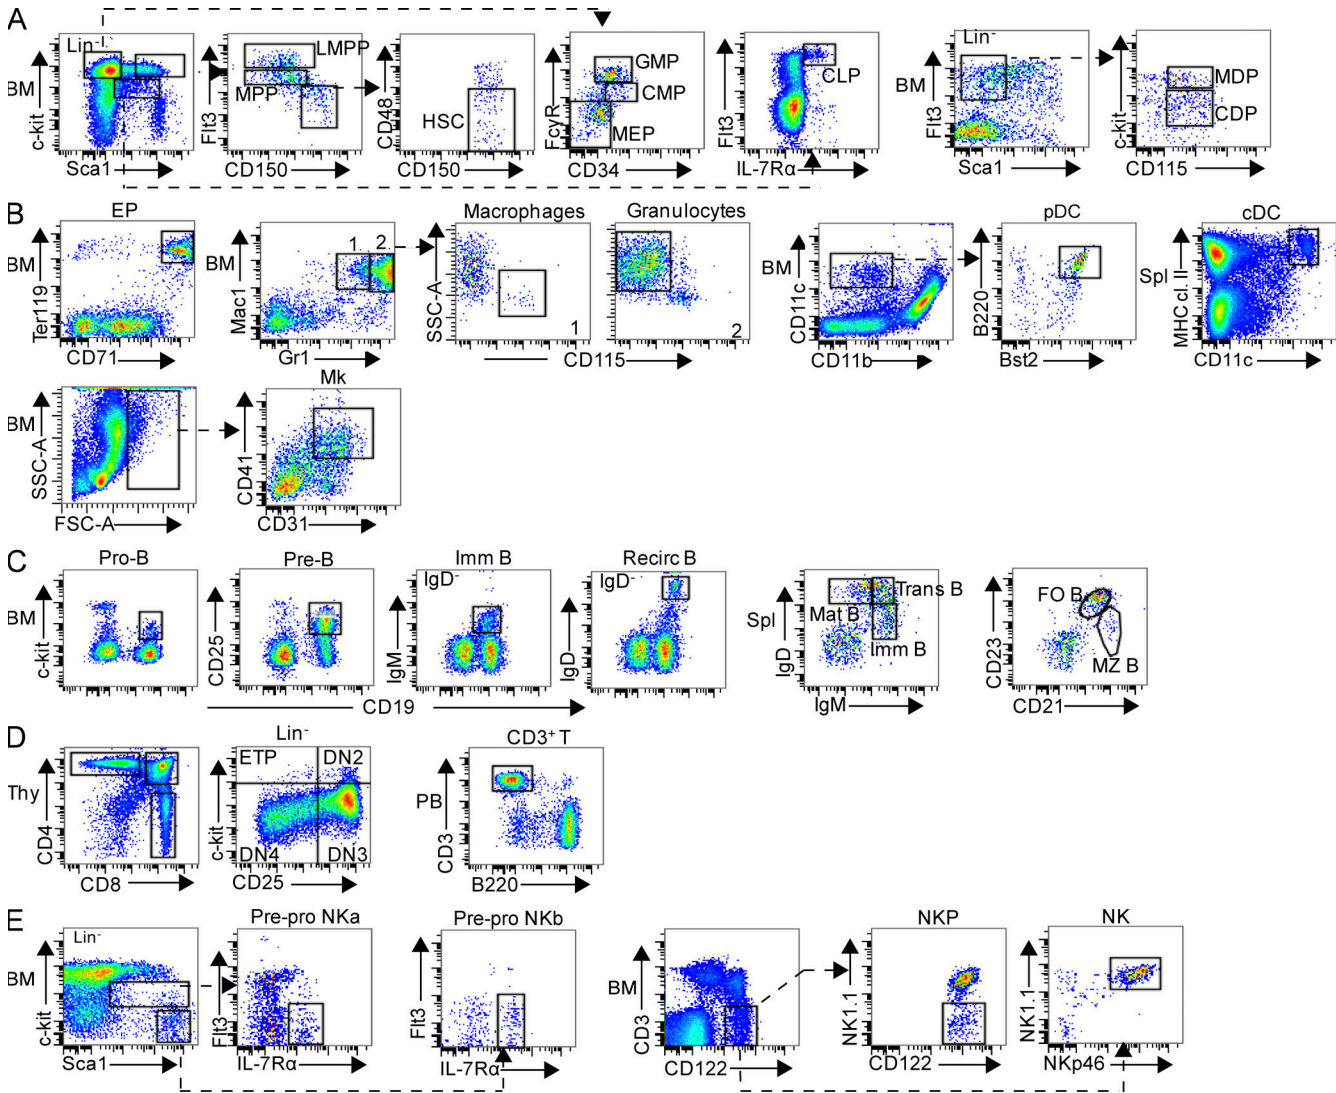

**Figure S1. Gating strategies of hematopoietic populations.** (A) HSC, MPP, LMPP, CMP, GMP, MEP, CLP, monocyte-dendritic precursor (MDP) and CDP. (B) EPs, macrophages, granulocytes, plasmacytoid dendritic cells (pDC), conventional dendritic cells (cDC), and megakaryocytes. (C) B cell compartment. (D) T cells. (E) NK cells in the BM. In all flow cytometry assays, at least 4 wild-type mice were analyzed for each cell type in independent experiments.

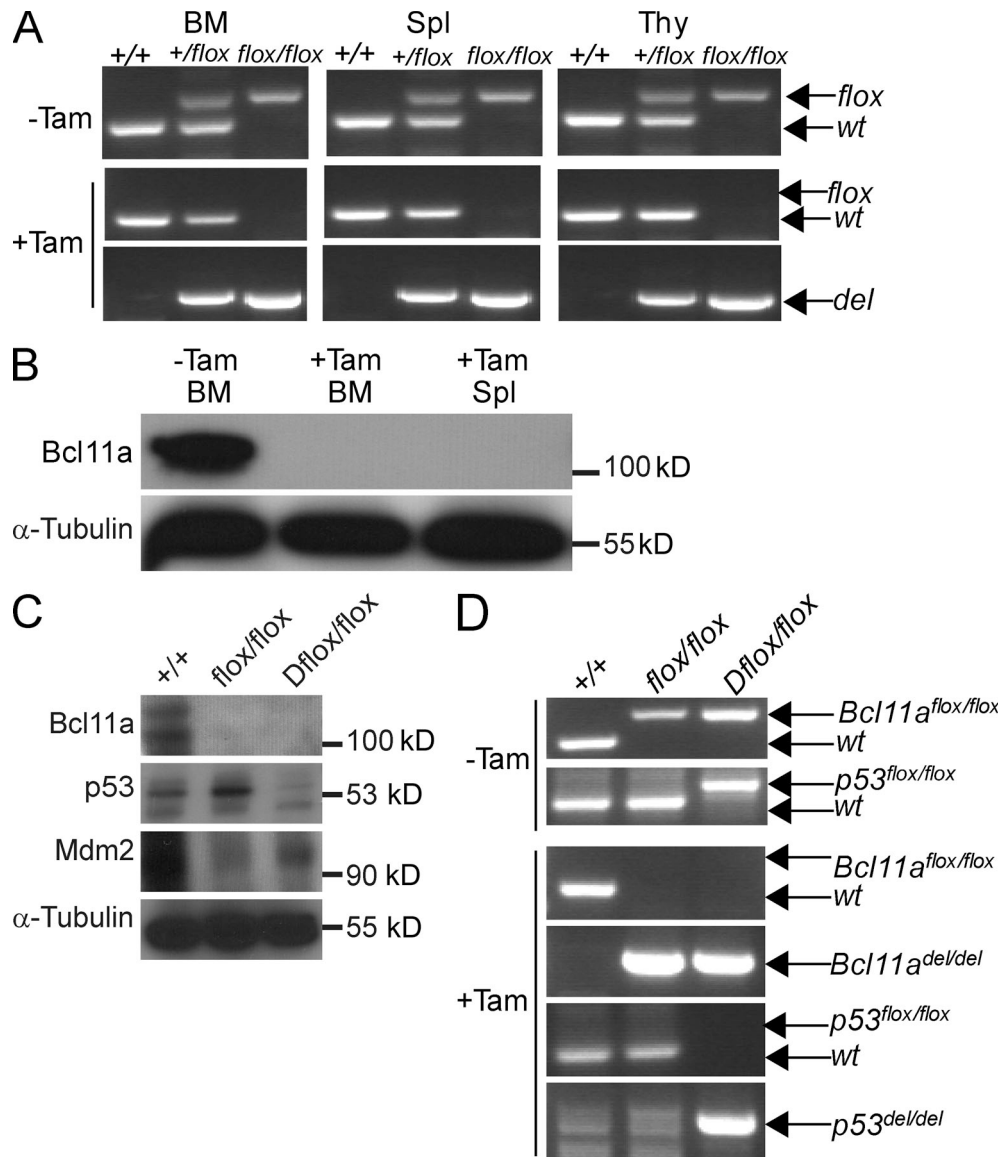

**Figure S2. Genotyping strategies.** (A) Genotyping cells of the BM, spleen (Spl), and thymus (Thy) for *Bcl11a* deletion (absence of the *flox* allele). *wt*, wild-type allele; *flox*, conditional knockout allele; *del*, deletion allele. (B) Western blotting analysis of BM and Spl cells for Bcl11a protein.  $\alpha$ -Tubulin was the loading control. (C) Western blot analysis of Bcl11a, p53, and Mdm2 in cultured BM B cells of indicated genotypes. Loading control,  $\alpha$ -tubulin. (D) Genotyping of cells for *Bcl11a* and p53 deletion. *Bcl11a<sup>flox/flox</sup>*, *Bcl11a* conditional knockout allele; *p53<sup>flox/flox</sup>*, p53 conditional knockout allele; *Bcl11a<sup>del/del</sup>*: *Bcl11a* deletion allele. *p53<sup>del/del</sup>*: p53 deletion allele.

SUPPLEMENTAL MATERIAL

Yu et al., <http://www.jem.org/cgi/content/full/jem.20121846/DC1>

**Table S1.** Hematopoietic population definitions

| Tissue           | Population         | Makers                                                                                                        | Lineage             |
|------------------|--------------------|---------------------------------------------------------------------------------------------------------------|---------------------|
| Bone marrow      | HSC                | Lin <sup>-</sup> Scal <sup>+</sup> c-kit <sup>+</sup> Flt3 <sup>-</sup> CD48 <sup>-</sup> CD150 <sup>+</sup>  | B220, CD3ε, CD4,    |
|                  | MPP                | Lin <sup>-</sup> Scal <sup>+</sup> c-kit <sup>+</sup> Flt3 <sup>inter</sup> CD150 <sup>-</sup>                | CD8α, NK1.1,        |
|                  | LMPP               | Lin <sup>-</sup> Scal <sup>+</sup> c-kit <sup>+</sup> Flt3 <sup>+</sup>                                       | CD11b, Ly6G,        |
|                  | CLP                | Lin <sup>-</sup> Flt3 <sup>+</sup> IL-7Rα <sup>+</sup> scal <sup>low</sup> c-kit <sup>low</sup>               | Ter119              |
|                  | Pre-pro NKa        | Lin <sup>-</sup> Scal <sup>+</sup> c-kit <sup>int</sup> Flt3 <sup>-</sup> IL-7Rα <sup>+</sup>                 |                     |
|                  | Pre-pro NKb        | Lin <sup>-</sup> Scal <sup>+</sup> c-kit <sup>-</sup> Flt3 <sup>-</sup> IL-7Rα <sup>+</sup>                   |                     |
|                  | CMP                | Lin <sup>-</sup> Scal <sup>-</sup> c-kit <sup>+</sup> FcyR <sup>int</sup> CD34 <sup>int</sup>                 | B220, CD19          |
|                  | GMP                | Lin <sup>-</sup> Scal <sup>-</sup> c-kit <sup>+</sup> FcyR <sup>hi</sup> CD34 <sup>hi</sup>                   | CD3ε, CD4, CD8α,    |
|                  | MEP                | Lin <sup>-</sup> Scal <sup>-</sup> c-kit <sup>+</sup> FcyR <sup>low</sup> CD34 <sup>low</sup>                 | NK1.1, Ly6G,        |
|                  | MDP                | Lin <sup>-</sup> Scal <sup>-</sup> c-kit <sup>hi</sup> Flt3 <sup>+</sup> CD115 <sup>+</sup>                   | IgM, IL-7Rα,        |
|                  | CDP                | Lin <sup>-</sup> Scal <sup>-</sup> c-kit <sup>low</sup> Flt3 <sup>+</sup> CD115 <sup>+</sup>                  | Ter119              |
|                  | Pro-B              | B220 <sup>+</sup> CD19 <sup>+</sup> CD43 <sup>+</sup> c-Kit <sup>+</sup> IgM <sup>-</sup>                     |                     |
|                  | Pre-B              | B220 <sup>+</sup> CD19 <sup>+</sup> CD43 <sup>-</sup> CD25 <sup>+</sup> IgM <sup>-</sup>                      |                     |
|                  | Imm B              | B220 <sup>+</sup> CD19 <sup>+</sup> IgM <sup>hi</sup> IgD <sup>-</sup>                                        |                     |
|                  | Recirc B           | B220 <sup>+</sup> CD19 <sup>+</sup> IgD <sup>+</sup>                                                          |                     |
|                  | NKP                | CD122 <sup>+</sup> NK1.1 <sup>-</sup> CD3 <sup>-</sup>                                                        |                     |
|                  | NK                 | NK1.1 <sup>+</sup> CD122 <sup>+</sup> NKp46 <sup>+</sup> CD3 <sup>-</sup>                                     |                     |
|                  | Macrophages        | Mac1 <sup>+</sup> Gr1 <sup>low</sup> CD115 <sup>+</sup>                                                       |                     |
|                  | Granulocytes       | Mac1 <sup>+</sup> Gr1 <sup>hi</sup> CD115 <sup>-</sup>                                                        |                     |
|                  | EP                 | CD11b <sup>-</sup> Ly6G <sup>-</sup> CD3 <sup>-</sup> B220 <sup>-</sup> Ter119 <sup>+</sup> CD71 <sup>+</sup> |                     |
|                  | pDC                | CD11b <sup>-</sup> CD11c <sup>low</sup> B220 <sup>-</sup> Bst2 <sup>+</sup>                                   |                     |
|                  | cDC                | CD11c <sup>hi</sup> MHC cI.II <sup>+</sup>                                                                    |                     |
|                  | Megakaryocytes     | FSC <sup>hi</sup> CD41 <sup>+</sup> CD31 <sup>+</sup>                                                         |                     |
| Thymus           | ETP                | Lin <sup>-</sup> c-kit <sup>hi</sup> CD25 <sup>-</sup>                                                        | B220, CD19, CD3ε,   |
|                  | DN2                | Lin <sup>-</sup> c-kit <sup>hi</sup> CD25 <sup>+</sup>                                                        | CD8α, TCRβ, TCRγδ,  |
|                  | DN3                | Lin <sup>-</sup> c-kit <sup>-</sup> CD25 <sup>+</sup>                                                         | NK1.1, CD11c, CD11b |
|                  | DN4                | Lin <sup>-</sup> c-kit <sup>-</sup> CD25 <sup>-</sup>                                                         | , Ly-6G, Ter119     |
| Spleen           | Imm B              | CD19 <sup>+</sup> IgM <sup>hi</sup> IgD <sup>-</sup>                                                          |                     |
|                  | Trans B            | CD19 <sup>+</sup> IgM <sup>hi</sup> IgD <sup>hi</sup>                                                         |                     |
|                  | Mat B              | CD19 <sup>+</sup> IgM <sup>low</sup> IgD <sup>-</sup>                                                         |                     |
|                  | MZ B               | CD21 <sup>hi</sup> CD23 <sup>low</sup>                                                                        |                     |
|                  | FO B               | CD21 <sup>int</sup> CD23 <sup>hi</sup>                                                                        |                     |
|                  | NK                 | NK1.1 <sup>+</sup> Ter119 <sup>-</sup> Gr1 <sup>-</sup> Mac1 <sup>-</sup> B220 <sup>-</sup> CD3 <sup>-</sup>  |                     |
|                  | CD3 <sup>+</sup> T | Ter119 <sup>-</sup> Gr1 <sup>-</sup> Mac1 <sup>-</sup> B220 <sup>-</sup> CD3 <sup>+</sup>                     |                     |
| Peripheral blood | B                  | Ter119 <sup>-</sup> Gr1 <sup>-</sup> Mac1 <sup>-</sup> B220 <sup>+</sup> CD3 <sup>-</sup>                     |                     |
|                  | T                  | Ter119 <sup>-</sup> Gr1 <sup>-</sup> Mac <sup>-</sup> B220 <sup>-</sup> CD3 <sup>+</sup>                      |                     |
|                  | NK                 | NK1.1 <sup>+</sup> Ter119 <sup>-</sup> Gr1 <sup>-</sup> Mac <sup>-</sup> B220 <sup>-</sup> CD3 <sup>-</sup>   |                     |
|                  | GM                 | Ter119 <sup>-</sup> Mac1 <sup>+</sup> Gr1 <sup>+</sup> CD3 <sup>-</sup> B220 <sup>-</sup>                     |                     |

**Table S2. Antibodies in this study**

| <b>Epitope</b> | <b>Clone</b> | <b>Conjugate</b>     | <b>Company</b> |
|----------------|--------------|----------------------|----------------|
| B220           | RA3-6B2      | Brilliant Violet 421 | BioLegend      |
|                | RA3-6B2      | FITC                 | eBioscience    |
|                | RA3-6B2      | PE                   | eBioscience    |
|                | RA3-6B2      | APC-Cy7              | BioLegend      |
|                | RA3-6B2      | PerCP-Cy5.5          | BioLegend      |
| CD19           | RA3-6B2      | PE-Cy5.5             | BD             |
|                | 6D5          | Brilliant Violet 421 | BioLegend      |
|                | 1D3          | FITC                 | eBioscience    |
|                | 1D3          | PE                   | BD             |
|                | 1D3          | APC                  | eBioscience    |
| CD3ε           | 1D3          | PE-Cy5.5             | eBioscience    |
|                | 145-2C11     | FITC                 | eBioscience    |
|                | 145-2C11     | PE                   | BD             |
|                | 145-2C11     | Alexa Fluor 647      | BioLegend      |
|                | 145-2C11     | PE-Cy5.5             | BD             |
| CD4            | RM4-5        | FITC                 | eBioscience    |
|                | RM4-5        | PE                   | BD             |
|                | RM4-5        | PE-Cy5.5             | BD             |
| CD8α           | 53-6.7       | FITC                 | BioLegend      |
|                | 53-6.7       | PE                   | BD             |
|                | 53-6.7       | PE-Cy5.5             | BD             |
| TCRβ           | B20.6        | FITC                 | BD             |
|                | H57-597      | PE-Cy5.5             | BD             |
| DX5            | DX5          | FITC                 | BD             |
|                | DX5          | PE                   | BD             |
| TCRγδ          | GL3          | FITC                 | BD             |
| NK1.1          | PK136        | FITC                 | BD             |
|                | PK136        | PE                   | eBioscience    |
|                | PK136        | PerCP-Cy5.5          | BD             |
|                | PK136        | PE-Cy5.5             | BioLegend      |
| CD11b          | M1/70        | FITC                 | eBioscience    |
|                | M1/70        | PE                   | BD             |
|                | M1/70        | PE-Cy7               | eBioscience    |
|                | M1/70        | PE-Cy5.5             | eBioscience    |
| CD11c          | N418         | FITC                 | eBioscience    |
|                | HL3          | PE                   | BD             |
|                | N418         | PE-Cy5               | eBioscience    |
|                | N418         | Brilliant Violet 421 | BioLegend      |
| Gr1            | RB6-8C5      | FITC                 | BD             |
|                | RB6-8C5      | PE                   | BioLegend      |
|                | RB6-8C5      | PE-Cy5.5             | eBioscience    |
| Ter119         | TER-119      | FITC                 | eBioscience    |
|                | TER-119      | PE                   | eBioscience    |
|                | TER-119      | APC                  | BioLegend      |
|                | TER-119      | PE-Cy5.5             | BioLegend      |
| IgM            | RMM-1        | FITC                 | BioLegend      |
|                | RMM-1        | PE                   | BioLegend      |

|                |               |                      |             |
|----------------|---------------|----------------------|-------------|
|                | II/41         | PE-Cy5               | eBioscience |
| IgD            | 11-26C.2A     | FITC                 | BD          |
|                | 11-26C        | APC                  | eBioscience |
| c-kit          | 2B8           | PerCP-Cy5.5          | BioLegend   |
|                | 2B8           | Brilliant Violet 421 | BioLegend   |
| Flt3           | A2F10         | PE                   | eBioscience |
| Sca1           | D7            | APC                  | eBioscience |
|                | D7            | PE-Cy7               | BD          |
|                | D7            | V450                 | BD          |
| IL-7R $\alpha$ | SB/199        | FITC                 | BioLegend   |
|                | SB/199        | PE                   | BD          |
|                | A7R34         | APC                  | BioLegend   |
|                | A7R34         | Brilliant Violet 421 | BioLegend   |
| Fc $\gamma$ R  | 2.4G2         | PE-Cy7               | BD          |
| CD34           | MEC 14.7      | Brilliant Violet 421 | BioLegend   |
|                | RAM34         | Alexa Fluor 700      | BD          |
| CD150          | TC15-12F 12.2 | APC                  | BioLegend   |
| CD48           | HM48-1        | Alexa Fluor 700      | BioLegend   |
| CD71           | RI7217        | PE                   | BioLegend   |
| CD25           | PC61          | APC                  | BD          |
| Ly6d           | 49-H4         | Alexa Fluor 647      | BD          |
| CD115          | AFS98         | APC                  | BioLegend   |
| CD43           | S7            | FITC                 | BD          |
|                | S7            | PE                   | BD          |
| CD317(Bst2)    | 927           | Pacific Blue         | BioLegend   |
| MHC cl.II      | M5/114.15.2   | PerCP-Cy5.5          | BioLegend   |
| CD41           | MWReg30       | PE                   | BioLegend   |
|                | MWReg30       | APC                  | eBioscience |
| CD31           | MEC13.3       | APC                  | BioLegend   |
| CD21           | eBio8D9       | PE                   | eBioscience |
|                | 4E3           | eFluor450            | eBioscience |
| CD23           | B3B4          | PE                   | BD          |
| CD45.1         | A20           | APC-eFluor 780       | eBioscience |
| CD122          | TM-B1         | eFluor450            | eBioscience |

---

**Table S3. Primers used in this study**

| <b>Genotyping primers</b>          |                              |                        |                           |
|------------------------------------|------------------------------|------------------------|---------------------------|
| Genotyping PCR primers             | Primer sequence (5'-3')      |                        | Size of PCR products (bp) |
| Bcl11a-cko-FW                      | TAGCTCCTGCTAGCCAGGTTTCTT     |                        | 377(wild type)            |
| Bcl11a-cko-RV                      | CGAGGCTTGCAGAAACAGAAAGAT     |                        | 470( <i>flox</i> )        |
| Bcl11a-cko-DEL                     | CTCGAAGGGAGGTTTCGGTATTGTG    |                        | 700( <i>del</i> )         |
| Bcl11a-eGFP-5'-FW                  | GAGACAAGAACAGGTGCAAGAGTGGATT |                        | 6746(targeted)            |
| Bcl11a-eGFP-5'-RV                  | GGGTTATTGAATATGATCGGAATTGGGC |                        |                           |
| Bcl11a-eGFP-3'-FW                  | GAAAGAACCAGCTGGGGCTCGACTAGAG |                        | 4507(targeted)            |
| Bcl11a-eGFP-3'-RV                  | CAGCGAGGTCCCCTTTCTCACTAAAAAT |                        |                           |
| <b>Primers for ChIP assay qPCR</b> |                              |                        |                           |
| PCR primers                        | Primer sequence (5'-3')      |                        |                           |
| Mdm2-Fwd                           | GCCAGCGTAGCCTAGGAG           |                        |                           |
| Mdm2-Rev                           | AAGAGGGAATGATCGGGACT         |                        |                           |
| Mdm4-Fwd                           | CAGGGTCCGCTCTATGGTT          |                        |                           |
| Mdm4-Rev                           | ACCCCAACACCACACCTTAC         |                        |                           |
| Cdkn1a-Fwd                         | GGGCCAGAGCTAAGAGCAC          |                        |                           |
| Cdkn1a-Rev                         | CACGCACGTACACAGACACA         |                        |                           |
| Bcl2-Fwd                           | GGGGACAAGCTGTTGTAGGA         |                        |                           |
| Bcl2-Rev                           | AGAGGGGACAGATAGCGATG         |                        |                           |
| Bcl2l1-Fwd                         | GCTGTGCAGGGAGGAGATAA         |                        |                           |
| Bcl2l1-Rev                         | CTCTGGGAGTAGGTGGTTGC         |                        |                           |
| Pax5-Fwd                           | GTGTGTGCATGAGCATGTGA         |                        |                           |
| Pax5-Rev                           | CCATTCCATGTGCAGAGATG         |                        |                           |
| Tcf3-Fwd                           | GGGACAGAGTGAGGACAGTCA        |                        |                           |
| Tcf3-Rev                           | CCCCATCTACTCTGTCACCA         |                        |                           |
| <b>qRT-PCR primers</b>             |                              |                        |                           |
| Gene name                          | Forward primer (5'-3')       | Reverse primer (5'-3') | Company                   |
| <i>Bcl11a</i>                      | AOD Probe                    | Mm01225235_m1          | Applied Biosystems        |
| <i>Sfp1</i>                        | AOD Probe                    | Mm00488142_m1          | Applied Biosystems        |
| <i>Ikzf1</i>                       | AOD Probe                    | Mm01187882_m1          | Applied Biosystems        |
| <i>Tcf3</i>                        | AOD Probe                    | Mm01175591_m1          | Applied Biosystems        |
| <i>Ebf1</i>                        | AOD Probe                    | Mm00395519_m1          | Applied Biosystems        |
| <i>Pax5</i>                        | AOD Probe                    | Mm00435501_m1          | Applied Biosystems        |
| <i>Cd79a</i>                       | AOD Probe                    | Mm00432423_m1          | Applied Biosystems        |
| <i>Foxo1</i>                       | AOD Probe                    | Mm00490672_m1          | Applied Biosystems        |
| <i>Il7r</i>                        | AOD Probe                    | Mm00434295_m1          | Applied Biosystems        |
| <i>Stat5a</i>                      | AOD Probe                    | Mm03053818_s1          | Applied Biosystems        |
| <i>Notch1</i>                      | AOD Probe                    | Mm00435249_m1          | Applied Biosystems        |
| <i>Bcl11b</i>                      | AOD Probe                    | Mm00480516_m1          | Applied Biosystems        |
| <i>Cebpa</i>                       | AOD Probe                    | Mm00514283_s1          | Applied Biosystems        |
| <i>Pbx1</i>                        | AOD Probe                    | Mm04207617_m1          | Applied Biosystems        |
| <i>Runx1</i>                       | AOD Probe                    | Mm01213405_m1          | Applied Biosystems        |
| <i>Mef2c</i>                       | AOD Probe                    | Mm01340842_m1          | Applied Biosystems        |
| <i>Ccr9</i>                        | AOD Probe                    | Mm01718955_g1          | Applied Biosystems        |
| <i>Flt3</i>                        | AOD Probe                    | Mm00439016_m1          | Applied Biosystems        |
| <i>Foxp1</i>                       | AOD Probe                    | Mm00474848_m1          | Applied Biosystems        |
| <i>Mpo</i>                         | AOD Probe                    | Mm01298424_m1          | Applied Biosystems        |
| <i>Csf3r</i>                       | AOD Probe                    | Mm00432735_m1          | Applied Biosystems        |

**Table S4.** Lymphoid genes enriched for clustering from microarray data

|                |                                 |               |               |
|----------------|---------------------------------|---------------|---------------|
| <i>Sfpi1</i>   | <i>Foxo3a</i>                   | <i>Tcf7</i>   | <i>Scd1</i>   |
| <i>Ikzf1</i>   | <i>Pten</i>                     | <i>Mef2c</i>  | <i>Car13</i>  |
| <i>TCF3</i>    | <i>Dntt</i>                     | <i>Gfi1</i>   | <i>Cplx2</i>  |
| <i>EBF1</i>    | <i>Ets1</i>                     | <i>Evi1</i>   | <i>E2f2</i>   |
| <i>Pax5</i>    | <i>Lef1</i>                     | <i>Bach2</i>  | <i>Ikzf3</i>  |
| <i>Foxo1</i>   | <i>Syk</i>                      | <i>Hes1</i>   | <i>Cbx2</i>   |
| <i>Cd79a</i>   | <i>Runx1</i>                    | <i>Xbp1</i>   | <i>Hes5</i>   |
| <i>Cd79b</i>   | <i>Runx2</i>                    | <i>Igh-6</i>  | <i>Pold4</i>  |
| <i>Vpreb1</i>  | <i>Runx3</i>                    | <i>Igll 1</i> | <i>Zfpm1</i>  |
| <i>Vpreb2</i>  | <i>Id2</i>                      | <i>Klf4</i>   | <i>Dtx1</i>   |
| <i>Vpreb3</i>  | <i>Id3</i>                      | <i>C-kit</i>  | <i>Bcar3</i>  |
| <i>Cd19</i>    | <i>Sox4</i>                     | <i>Cebpb</i>  | <i>Nedd9</i>  |
| <i>Erg</i>     | <i>Stat3</i>                    | <i>Ccnd3</i>  | <i>Sit1</i>   |
| <i>Blk</i>     | <i>IL-7R<math>\alpha</math></i> | <i>Bcl7a</i>  | <i>Btg2</i>   |
| <i>Ccr7</i>    | <i>Stat5a</i>                   | <i>Bcl7b</i>  | <i>Tox</i>    |
| <i>Ccr9</i>    | <i>Stat5b</i>                   | <i>Cd93</i>   | <i>Tmem66</i> |
| <i>Cxcr4</i>   | <i>Sirt1</i>                    | <i>Flt3</i>   | <i>CD22</i>   |
| <i>Pou2f1</i>  | <i>Sirt3</i>                    | <i>Foxo6</i>  | <i>Evx1</i>   |
| <i>Pou2af1</i> | <i>Gata3</i>                    | <i>Ccn3</i>   | <i>Ncf4</i>   |
| <i>Rag1</i>    | <i>Notch1</i>                   | <i>Bank1</i>  | <i>Tbp</i>    |
| <i>Rag2</i>    | <i>Notch2</i>                   | <i>Tcf4</i>   | <i>Zap70</i>  |
| <i>Irf4</i>    | <i>Notch3</i>                   | <i>Bst1</i>   | <i>Pde2</i>   |
| <i>Irf8</i>    | <i>Stat1</i>                    | <i>Klf7</i>   | <i>Ccr2</i>   |
| <i>Blnk</i>    | <i>Foxp1</i>                    | <i>Clgn</i>   | <i>Parp1</i>  |
| <i>Ezh2</i>    | <i>Bcl6</i>                     | <i>Car2</i>   | <i>Hdac7</i>  |
